# Supplementary material for: mRNA Profiles of Porcine Parathyroid Glands Following Variable Phosphorus Supplies throughout Fetal and Postnatal Life
Source: MDPI journal article supplement (doi:10.3390/biomedicines9050454), 2021-04-22
Supplement: s1 [file s1]

**Table S1.** Analyzed nutrient composition of the experimental diets fed to sows during gestation and lactation.

| Item                 | Unit  | Gestation diets  |                  |                  | Lactation diets  |                  |                  |
|----------------------|-------|------------------|------------------|------------------|------------------|------------------|------------------|
|                      |       | L <sub>ges</sub> | M <sub>ges</sub> | H <sub>ges</sub> | L <sub>lac</sub> | M <sub>lac</sub> | H <sub>lac</sub> |
| DM                   | g/kg  | 889              | 888              | 890              | 888              | 898              | 887              |
| Crude ash            | g/kg  | 45.1             | 49.4             | 48.2             | 51.4             | 60.7             | 67.0             |
| Crude protein        | g/kg  | 142              | 154              | 145              | 189              | 195              | 198              |
| Crude fat            | g/kg  | 27.1             | 30.3             | 23.7             | 29.6             | 25.8             | 24.0             |
| Crude fibre          | g/kg  | 87.8             | 89.4             | 86.7             | 61.9             | 56.8             | 52.2             |
| Starch               | g/kg  | 282              | 268              | 284              | 388              | 385              | 391              |
| ME (pig)             | MJ/kg | 11.2             | 11.2             | 11.1             | 12.5             | 12.7             | 12.6             |
| Calcium              | g/kg  | 6.55             | 6.95             | 6.70             | 7.20             | 7.30             | 7.10             |
| Phosphorus (soluble) | g/kg  | 3.70             | 4.60             | 5.55             | 4.80             | 6.10             | 7.20             |
| Ca:P ratio           |       | 1.77             | 1.51             | 1.21             | 1.50             | 1.20             | 0.99             |

ges – gestation diet; lac – lactation diet
