# Supplementary material for: mRNA Profiles of Porcine Parathyroid Glands Following Variable Phosphorus Supplies throughout Fetal and Postnatal Life
Source: MDPI journal article supplement (doi:10.3390/biomedicines9050454), 2021-04-22
Supplement: s1 [file s1]

**Table S3.** Primer used in qRT-PCR to verify dissection of PTGs.

| <b>Primer</b> | <b>Sequence 5' – 3'</b> | <b>Melting temp.<br/>(°C)</b> | <b>Amplicon length<br/>(bp)</b> |
|---------------|-------------------------|-------------------------------|---------------------------------|
| PTH (for)     | CAGCCTTCTCGGGTTTACTCA   | 59.6                          | 228                             |
| PTH (rev)     | TCAGGTGTTTGCCCAGGTTA    | 58.7                          |                                 |
| RPL32 (for)   | AGCCCAAGATCGTCAAAAAG    | 57.1                          | 165                             |
| RPL32 (rev)   | TGTTGCTCCCATAACCAATG    | 56.6                          |                                 |

PTH – parathyroid hormone; RPL32 – ribosomal protein L32;
