# Supplementary material for: mRNA Profiles of Porcine Parathyroid Glands Following Variable Phosphorus Supplies throughout Fetal and Postnatal Life
Source: MDPI journal article supplement (doi:10.3390/biomedicines9050454), 2021-04-22
Supplement: s1 [file s1]

**Table S2.** Analyzed nutrient composition of the experimental diets fed to offspring during starter, grower and fattener periods.

| <b>Diets</b>  |             | <b>Starter diets</b>  |                       |                       | <b>Grower diets</b>   |                       |                       | <b>Fattener diets</b>  |                        |                        |
|---------------|-------------|-----------------------|-----------------------|-----------------------|-----------------------|-----------------------|-----------------------|------------------------|------------------------|------------------------|
|               |             | <b>(day 14-28)</b>    |                       |                       | <b>(day 29-62)</b>    |                       |                       | <b>(day 63-120)</b>    |                        |                        |
| <b>Item</b>   | <b>Unit</b> | <b>L<sub>st</sub></b> | <b>M<sub>st</sub></b> | <b>H<sub>st</sub></b> | <b>L<sub>gr</sub></b> | <b>M<sub>gr</sub></b> | <b>H<sub>gr</sub></b> | <b>L<sub>fat</sub></b> | <b>M<sub>fat</sub></b> | <b>H<sub>fat</sub></b> |
| DM            | g/kg        | 936                   | 95                    | 935                   | 904                   | 904                   | 887                   | 880                    | 881                    | 883                    |
| Crude ash     | g/kg        | 76.9                  | 75.2                  | 81.3                  | 64.3                  | 67.0                  | 62.6                  | 38.9                   | 40.3                   | 44.6                   |
| Crude protein | g/kg        | 218                   | 220                   | 215                   | 188                   | 185                   | 179                   | 178                    | 179                    | 175                    |
| Crude fat     | g/kg        | 128                   | 126                   | 125                   | 54.4                  | 55.7                  | 52.6                  | 28.8                   | 30.3                   | 31.2                   |
| Crude fibre   | g/kg        | 17.6                  | 26.8                  | 21.4                  | 48.1                  | 42.8                  | 36.1                  | 34.9                   | 40.0                   | 38.7                   |
| Starch        | g/kg        | 174                   | 150                   | 156                   | 373                   | 375                   | 378                   | 434                    | 428                    | 432                    |
| ME (pig)      | MJ/kg       | 16.0                  | 15.7                  | 15.7                  | 13.5                  | 13.7                  | 13.6                  | 13.5                   | 13.4                   | 13.4                   |
| Calcium       | g/kg        | 9.60                  | 8.61                  | 8.99                  | 10.60                 | 10.02                 | 9.59                  | 6.50                   | 6.40                   | 6.70                   |
| Phosphorus    | g/kg        | 6.63                  | 7.88                  | 9.11                  | 5.65                  | 6.84                  | 7.95                  | 4.12                   | 5.50                   | 6.96                   |
| Ca:P ratio    |             | 1.45                  | 1.09                  | 0.99                  | 1.88                  | 1.46                  | 1.21                  | 1.58                   | 1.16                   | 0.96                   |

st – starter diet; gr – grower diet; fat – fattener diet
