# Supplementary figures and images for: mRNA Profiles of Porcine Parathyroid Glands Following Variable Phosphorus Supplies throughout Fetal and Postnatal Life
Source: MDPI journal article supplement (doi:10.3390/biomedicines9050454), 2021-04-22

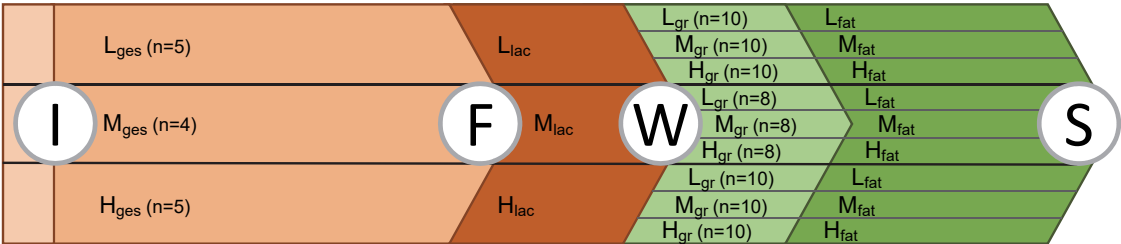

Gestation diet

Lactation diet

Grower diet

Fattener diet

Supplement: s1 [file s1]

A

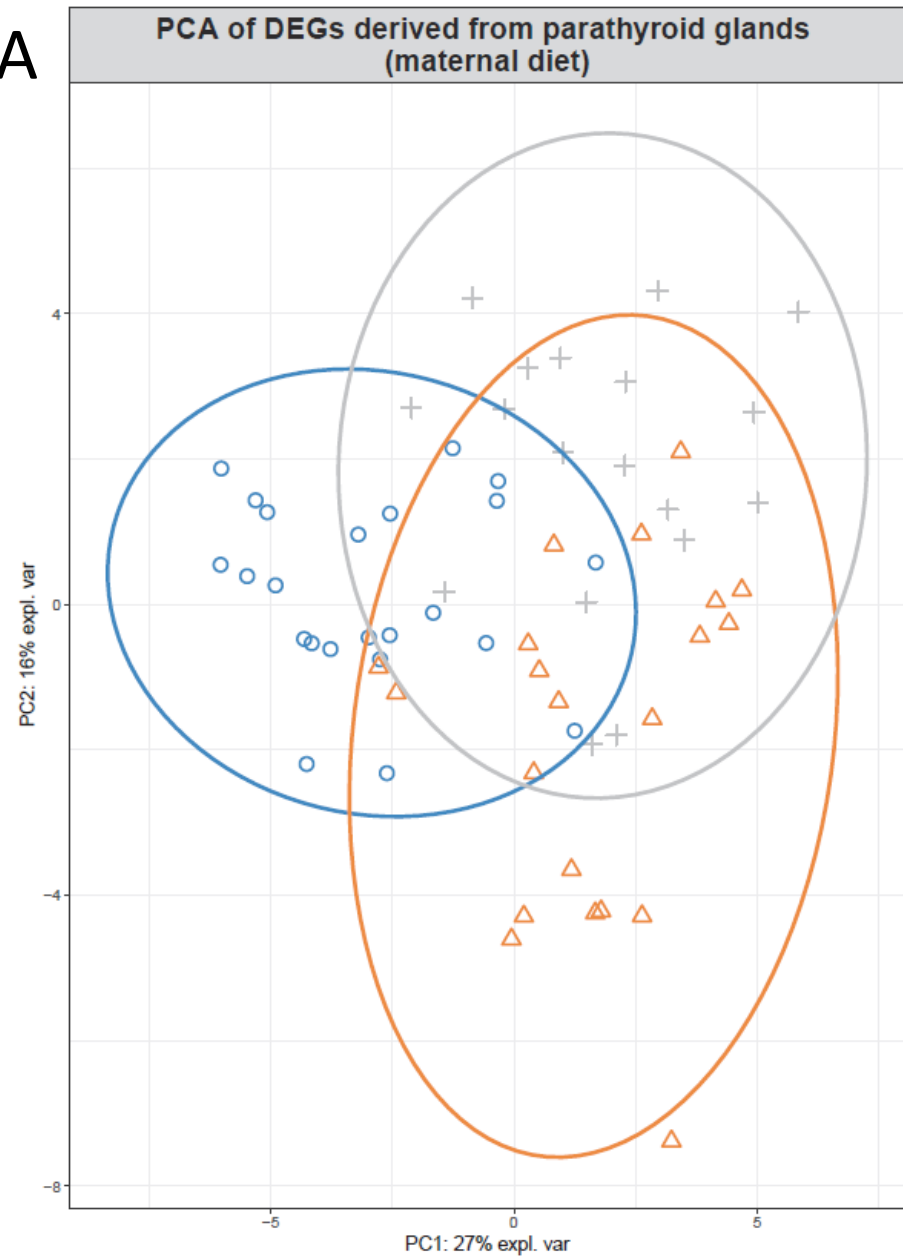

B

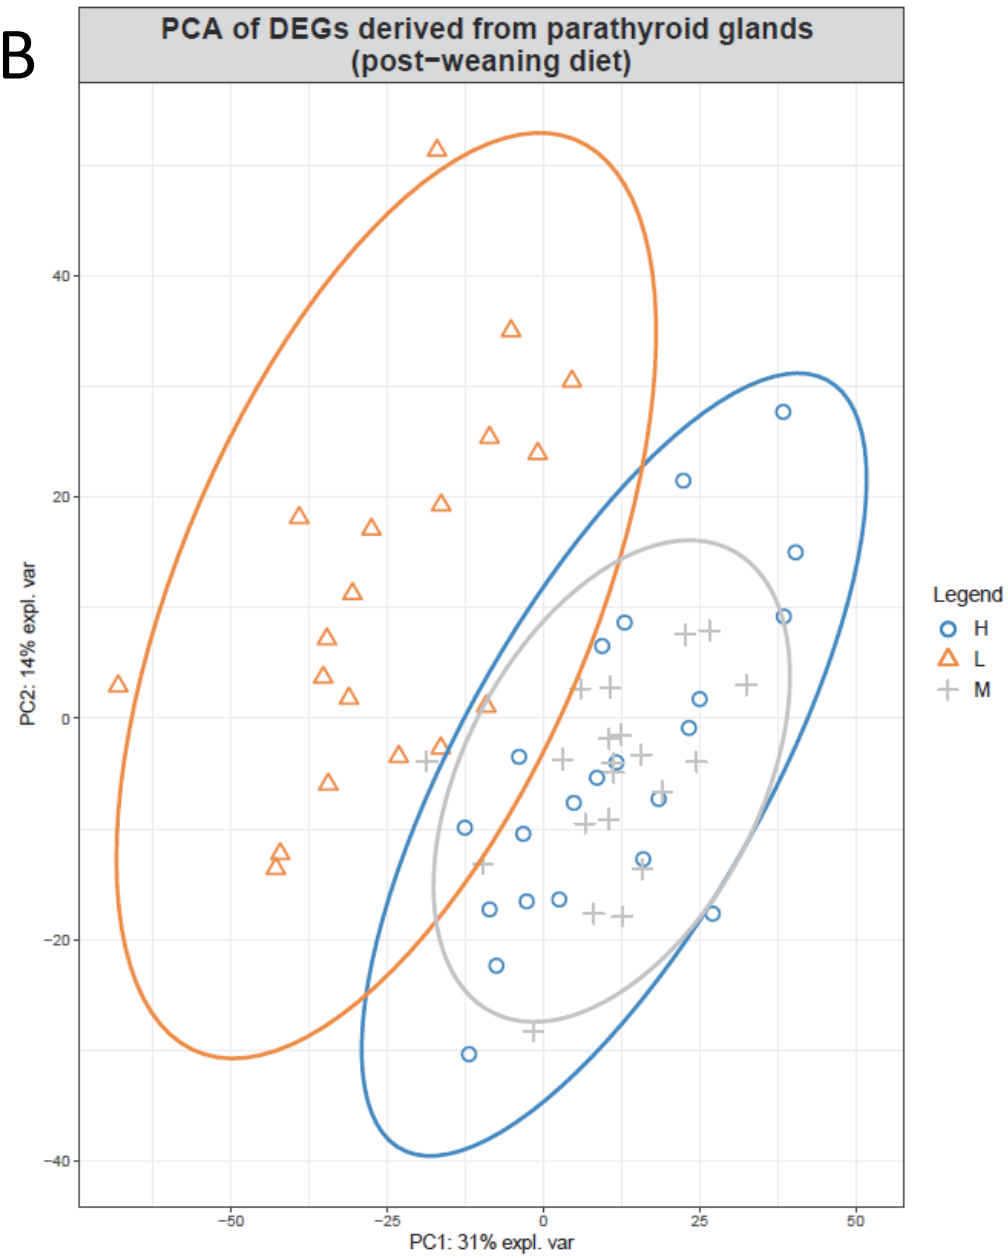

Supplement: s1 [file s1]
